# Supplementary material for: Electrodeposited CZTS solar cells from Reline electrolyte
Source: Royal Society of Chemistry journal article supplement (doi:10.1039/c4gc00142g), 2014-01-01
Supplement: c4gc00142g1.pdf [file c4gc00142g1.pdf]

## Electronic Supplementary Information

### Electrodeposited CZTS solar cells from the electrolyte of Reline

Hao Chen, Qinyan Ye, XuLin He, Jingjing Ding, Yongzheng Zhang, Junfeng Han, Jiang Liu \*, Cheng Liao \*, Jun Mei, WoonMing Lau

Chengdu Green Energy and Green Manufacturing Technology R&D Centre,  
Southwest Airport Economic Development Zone, Shuangliu, Chengdu, 610207, P. R.  
China

\* Corresponding author: Tel: +86-28-67076209, Fax: +86-28-67070129

E-mail address: [546jiang@163.com](mailto:546jiang@163.com) (J. Liu); [cliao315@hotmail.com](mailto:cliao315@hotmail.com) (C. Liao).

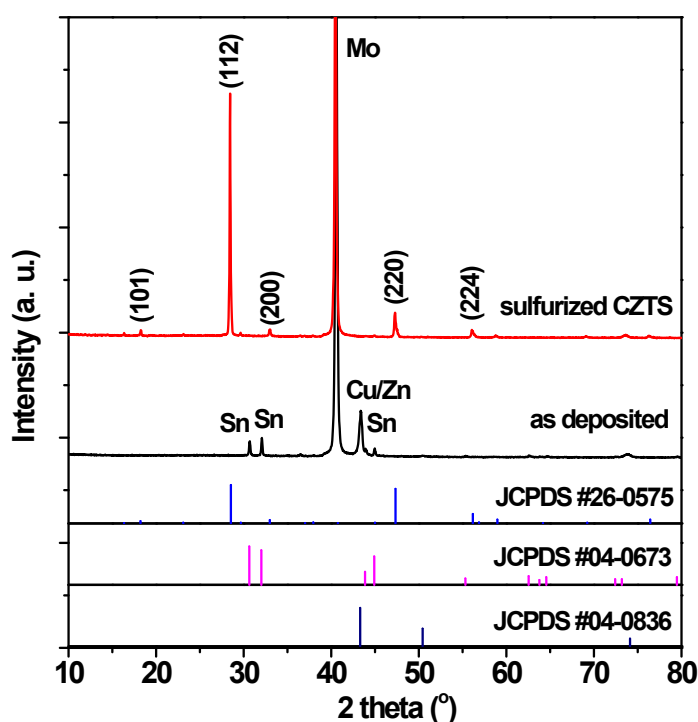

Figure S1 X-ray diffraction patterns of the co-electroplated CuZnSn precursor film and the sulfurized CZTS film. For reference, the standard XRD patterns of kesterite CZTS (JCPDS 26-0575), metal Sn (JCPDS 04-0673) and Cu (JCPDS 04-0836) are

shown below. The sulfurized CZTS XRD pattern compared with JCPDS 26-0575 suggests a basic kesterite crystal structure with a preferred orientation of (112). The peaks for CuZnSn precursor film correspond to elemental Cu, Zn and Sn phases.

The  $J$ - $V$  characteristic of a single heterojunction solar cell can be described as<sup>1, 2</sup>

$$J = -J_L + J_o \exp \left[ \frac{q}{AkT} (V - RJ) \right] + GV \quad (1)$$

where  $G$  is the shunt conductance,  $R$  is the series resistance,  $A$  is the ideality factor,  $k$  is the Boltzmann constant,  $J_o$  is the saturation current density,  $q$  is the elementary charge,  $J_L$  is the light induced constant current density. From the equation (1), it can be deduced

$$\frac{dV}{dJ} = R + \frac{AkT}{q} (J + J_L)^{-1} \quad (2)$$

$$\ln(J + J_L - GV) = \ln J_o + \frac{q}{AkT} (V - RJ) \quad (3)$$

Assuming that  $G=0$  and  $J_L = J_{sc}$ , the series resistance  $R$  and the ideality factor  $A$  can be obtained by plotting  $dV/dJ$  against  $(J+J_{sc}-GV)^{-1}$  to find the slope and intercept, respectively. Similarly, the saturation current density  $J_o$  can be obtained from the semilogarithmic plot of  $(V-RJ)$  against  $\ln(J+J_{sc}-GV)$ .

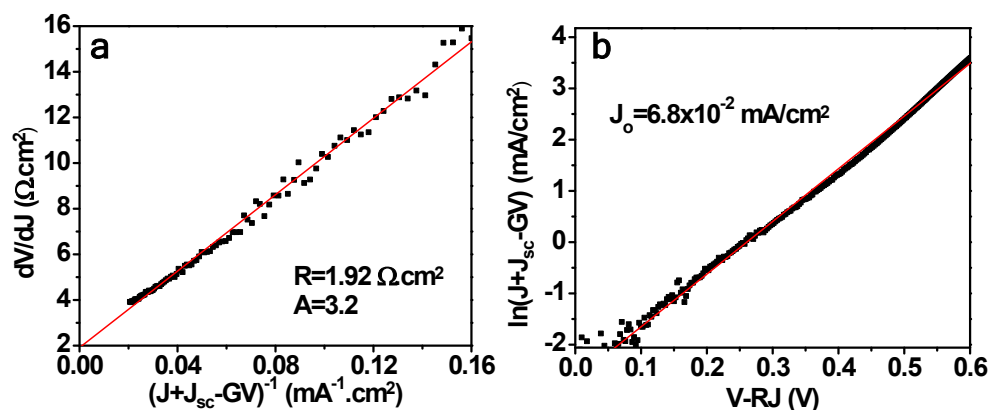

Figure S2. (a)  $dV/dJ$  versus  $(J+J_{sc}-GV)^{-1}$  with fit used to determine  $R$  and  $A$  according to the equation  $dV/dJ = R + AkT (J+J_{sc}-GV)^{-1} / q$ . (b)  $(V-RJ)$  versus  $\ln(J+J_{sc}-GV)$  with fit used to determine  $J_o$  according to the equation  $\ln(J+J_{sc}-GV) = \ln J_o + q (V - RJ) / kT$ .

$RJ) / AkT$ .

## References

1. S. S. Hegedus and W. N. Shafarman, *Progress in Photovoltaics: Research and Applications*, 2004, **12**, 155-176.
2. J. Shi, J. Dong, S. Lv, Y. Xu, L. Zhu, J. Xiao, X. Xu, H. Wu, D. Li, Y. Luo and Q. Meng, *Applied Physics Letters*, 2014, **104**, 063901.
